# Supplementary material for: Substance P-loaded electrospun small intestinal submucosa/poly(ε-caprolactone)-ran-poly(l-lactide) sheet to facilitate wound healing through MSC recruitment
Source: Royal Society of Chemistry journal article supplement (doi:10.1039/c9tb01532a), 2019-01-01
Supplement: c9tb01532a1.pdf [file c9tb01532a1.pdf]

## Supporting Information

### Substance P-loaded electrospun small intestinal submucosa/poly( $\epsilon$ -caprolactone)-ran-poly(L-lactide) sheet to facilitate wound healing through MSC recruitment

Min Ju Kim, Yun Bae Ji, Ji Young Seo, Seung Hun Park, Jae Ho Kim, Byoung Hyun Min,

Moon Suk Kim<sup>1,\*</sup>

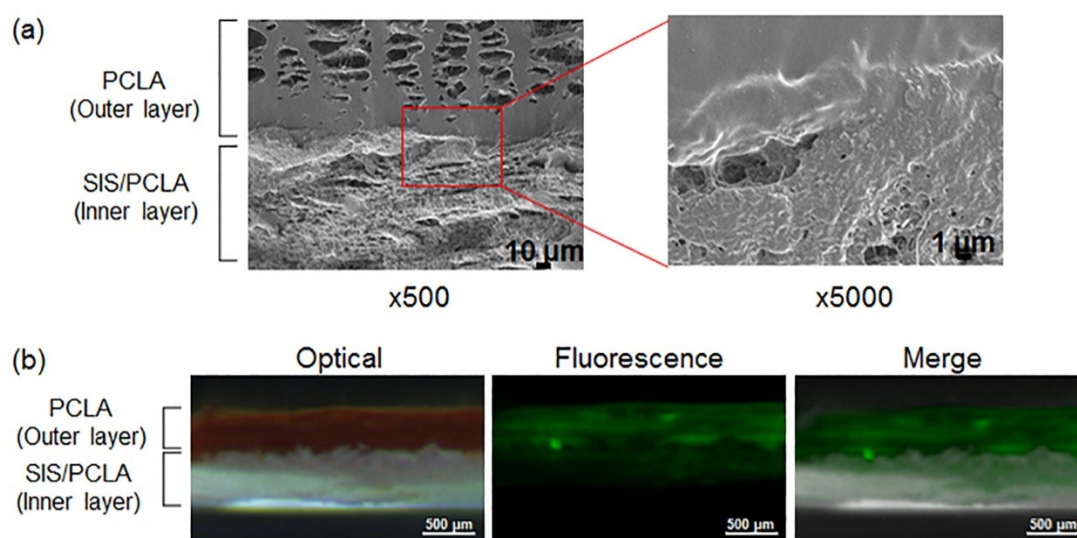

**Figure S1.** (a) SEM images of double-layered sheets with SIS/PCLA as the inner layer and PCLA as the outer layer and (b) optical, fluorescence and merged images double-layered sheets with SIS/PCLA as the inner layer and fluorescent-loaded PCLA as the outer layer.
